# Supplementary material
Source: PubMed Central journal article supplement (PMC3577525)

Figure S1  
Manno et al.

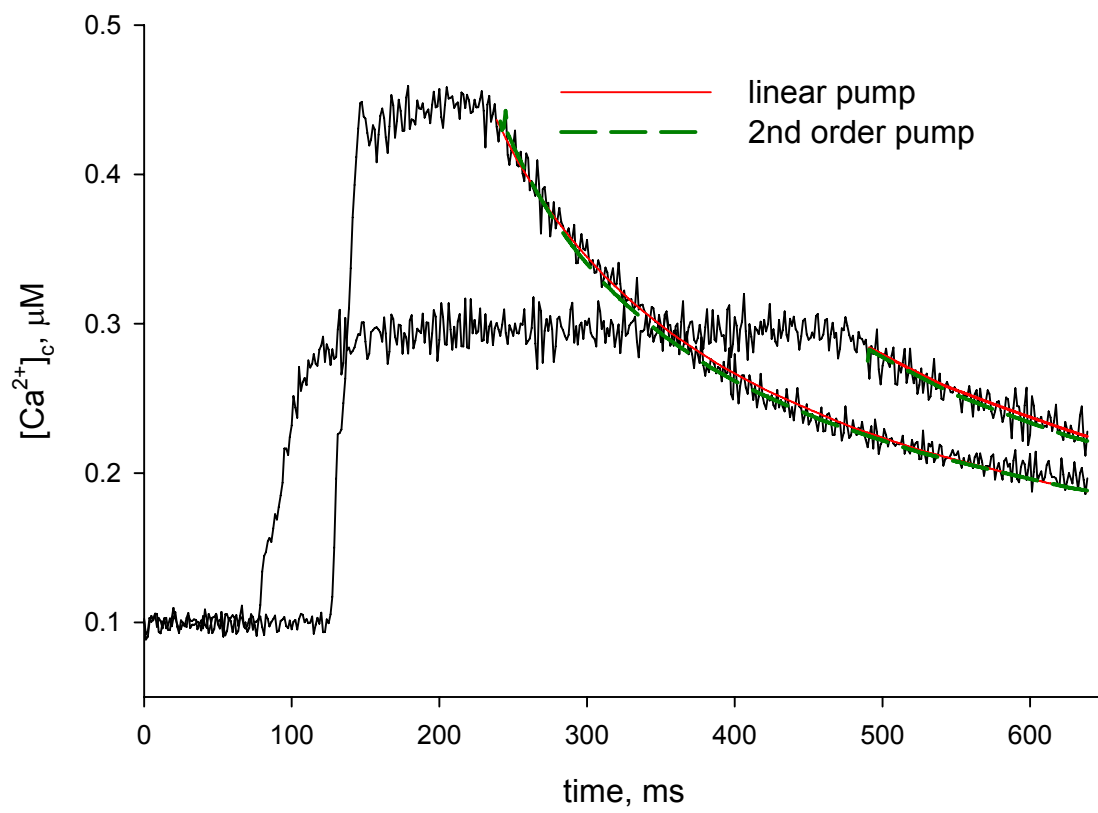

Supplement: tjp0591-0423-SD1.pdf [file tjp0591-0423-SD1.pdf]

Figure S2  
Manno et al.

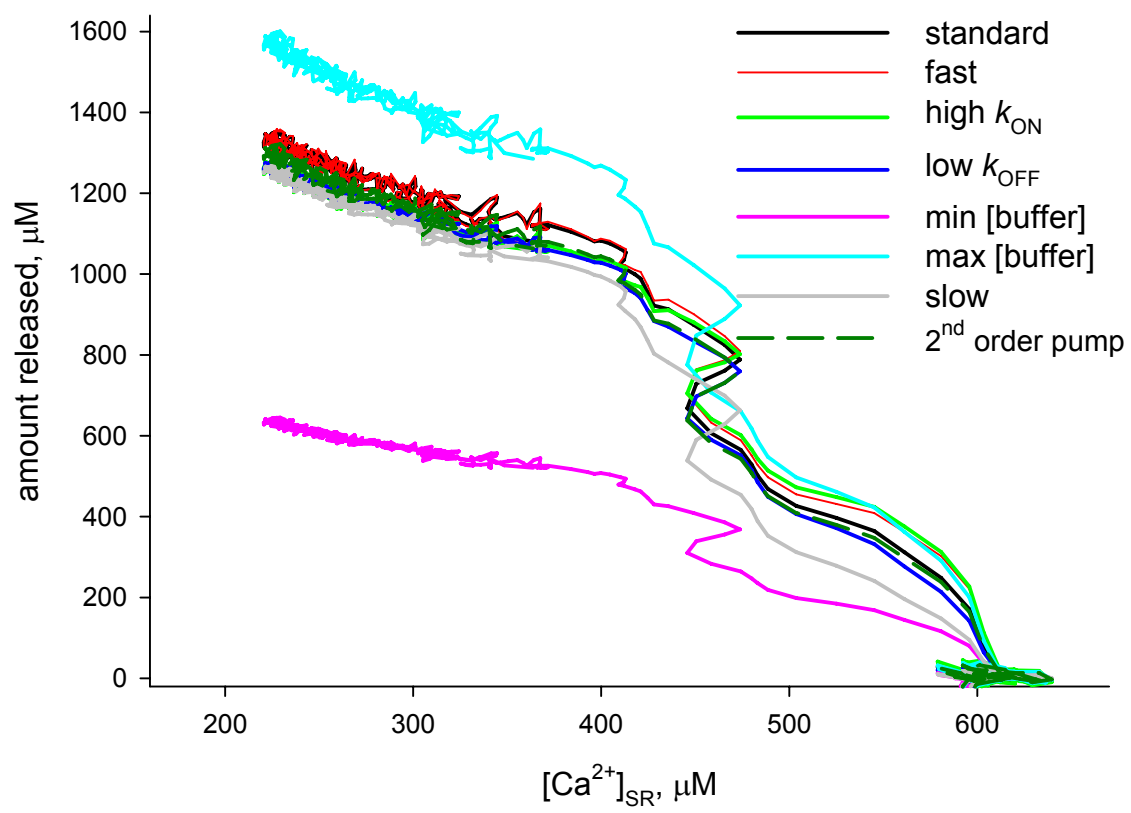

Supplement: tjp0591-0423-SD2.pdf [file tjp0591-0423-SD2.pdf]
